# Supplementary material for: Prevalence of atrial fibrillation
Source: Springer Nature journal article supplement (doi:10.1007/s00059-021-05090-7), 2021-12-13
Supplement: MOESM3 [file 19954438]

# Prevalence of atrial fibrillation

## The Swiss population-based CoLaus study

Herz

Daryoush Samim, MD <sup>1</sup>; Damien Choffat<sup>1\*</sup> ; Peter Vollenweider, MD <sup>1</sup>; Gérard Waeber, MD <sup>1</sup>;

Pedro Marques-Vidal, MD, PhD, FESC <sup>1</sup>; Marie Méan, MD <sup>1</sup>

<sup>1</sup> Department of medicine, internal medicine, Lausanne University Hospital and University of Lausanne, Switzerland.

The authors take responsibility for all aspects of the reliability and freedom from bias of the data presented and their discussed interpretation.

**\*Corresponding author (DC) :** [Damien.choffat@chuv.ch](mailto:Damien.choffat@chuv.ch)

**Supplementary Table 3:** characteristics of participants with and without atrial fibrillation, CoLaus|PsyCoLaus study, Lausanne, Switzerland. Analysis restricted to participants with all covariates.

|                                       | <b>Non-AF cases</b> | <b>AF cases</b>  | <b>P-value</b> |
|---------------------------------------|---------------------|------------------|----------------|
| N                                     | 3505                | 34               |                |
| Age (years)                           | 62±10               | 74±7             | <0.001         |
| Woman (%)                             | 1937 (55.3)         | 6 (17.6)         | <0.001         |
| History of cardiovascular disease (%) |                     |                  |                |
| Personal                              | 163 (4.7)           | 11 (32.4)        | <0.001         |
| Family                                | 1743 (49.7)         | 14 (41.2)        | 0.321          |
| Hypertension (%)                      | 1571 (44.8)         | 31 (91.2)        | <0.001         |
| Systolic BP (mmHg)                    | 126±17              | 130±24           | 0.213          |
| Diastolic BP (mmHg)                   | 77±10               | 80±15            | 0.137          |
| Body mass index (kg/m <sup>2</sup> )  | 26.5±4.6            | 29.3±4.8         | <0.001         |
| Body mass index categories (%)        |                     |                  | 0.001          |
| Normal + underweight                  | 1421 (40.5)         | 6 (17.6)         |                |
| Overweight                            | 1434 (40.9)         | 14 (41.2)        |                |
| Obese                                 | 650 (18.5)          | 14 (41.2)        |                |
| Dyslipidemia (%)                      | 1622 (46.3)         | 20 (58.8)        | 0.144          |
| Diabetes using FPG (%)                | 316 (9.0)           | 8 (23.5)         | 0.003          |
| Diabetes using HbA1c (%)              | 302 (8.6)           | 9 (26.5)         | <0.001         |
| Creatinine (µmol/L)                   | 79±20               | 95±26            | <0.001         |
| hs-CRP (mg/L)                         | 1.1 [0.5 – 2.2]     | 2.7 [0.8 – 4.4]  | 0.001 §        |
| Pro-BNP (ng/L)                        | 95 [65 - 150]       | 913 [587 - 1615] | <0.001 §       |
| Smoking categories (%)                |                     |                  | 0.255          |
| Never                                 | 1478 (42.2)         | 11 (32.4)        |                |
| Former                                | 1368 (39.0)         | 18 (52.9)        |                |
| Current                               | 659 (18.8)          | 5 (14.7)         |                |
| Alcohol drinkers (%)                  | 2583 (73.7)         | 31 (91.2)        | 0.021          |
| Alcohol consumption (units/week)      | 4 [0 - 8]           | 8 [3 – 17]       | <0.001 §       |
| Physical activity (%)                 | 1042 (43.3)         | 2 (14.3)         | 0.029          |

BP, blood pressure; FPG, fasting plasma glucose; hs-CRP, high-sensitivity c-reactive protein; pro-BNP, pro-Brain natriuretic peptide. Results are expressed as number of participants (percentage) for categorical data, as average ± standard deviation or as median [interquartile range] for continuous variables. Between-group comparisons using chi-square for categorical variables and student's test or Kruskal-Wallis test (§) for continuous variables
