# Supplementary material for: Prevalence of atrial fibrillation
Source: Springer Nature journal article supplement (doi:10.1007/s00059-021-05090-7), 2021-12-13
Supplement: MOESM4 [file 19954438]

# Prevalence of atrial fibrillation

## The Swiss population-based CoLaus study

Herz

Daryoush Samim, MD <sup>1</sup>; Damien Choffat<sup>1\*</sup> ; Peter Vollenweider, MD <sup>1</sup>; Gérard Waeber, MD <sup>1</sup>; Pedro Marques-Vidal, MD, PhD, FESC <sup>1</sup>; Marie

Méan, MD <sup>1</sup>

<sup>1</sup> Department of medicine, internal medicine, Lausanne University Hospital and University of Lausanne, Switzerland.

The authors take responsibility for all aspects of the reliability and freedom from bias of the data presented and their discussed interpretation.

**\*Corresponding author (DC)** : [Damien.choffat@chuv.ch](mailto:Damien.choffat@chuv.ch)

**Supplementary table 4:** multivariable analysis of the factors associated with atrial fibrillation or with combined atrial fibrillation + atrial flutter at 2nd follow-up, CoLaus|PsyCoLaus study, Lausanne, Switzerland. Analysis including risk of sleep apnea.

|                                               | <b>AF</b>          | <b>P-value</b> | <b>AF + AFL</b>    | <b>P-value</b> |
|-----------------------------------------------|--------------------|----------------|--------------------|----------------|
| Age (per decade)                              | 2.41 (1.08 - 5.38) | 0.033          | 2.70 (1.29 - 5.66) | 0.009          |
| Man vs. woman                                 | 8.25 (0.98 - 69.4) | 0.052          | 10.7 (1.30 - 87.4) | 0.028          |
| Personal history of CVD (yes vs. no)          | 3.44 (0.53 - 22.4) | 0.195          | 2.92 (0.48 - 17.6) | 0.243          |
| Hypertension (yes vs. no)                     | 3.30 (0.63 - 17.3) | 0.157          | 2.34 (0.57 - 9.62) | 0.240          |
| Body mass index categories                    |                    |                |                    |                |
| Normal + underweight                          | 1 (ref.)           |                | 1 (ref.)           |                |
| Overweight                                    | 3.78 (0.43 - 32.9) | 0.229          | 4.98 (0.60 - 41.6) | 0.139          |
| Obese                                         | 7.19 (0.68 - 75.8) | 0.101          | 6.88 (0.66 - 72.1) | 0.108          |
| Dyslipidemia (yes vs. no)                     | 0.29 (0.06 - 1.39) | 0.123          | 0.30 (0.07 - 1.24) | 0.096          |
| Diabetes using HbA <sub>1c</sub> (yes vs. no) | 1.89 (0.37 - 9.61) | 0.444          | 2.58 (0.60 - 11.0) | 0.201          |
| Creatinine (per 10 µmol/L increase)           | 1.07 (0.97 - 1.19) | 0.172          | 1.05 (0.95 - 1.16) | 0.334          |
| hs-CRP (per 1 mg/L increase)                  | 1.13 (0.95 - 1.34) | 0.161          | 1.13 (0.97 - 1.32) | 0.110          |
| Alcohol drinkers (yes vs. no)                 | 1.12 (0.21 - 5.98) | 0.892          | 0.76 (0.19 - 3.03) | 0.700          |
| Physical activity (yes vs. no)                | 1.12 (0.02 - 6.32) | 0.895          | 1.66 (0.37 - 7.45) | 0.505          |
| Risk of sleep apnea (high vs. low)            | 0.25 (0.05 - 1.34) | 0.105          | 0.41 (0.10 - 1.66) | 0.209          |

AF, atrial fibrillation; AFL, atrial flutter; CVD, cardiovascular disease. hs-CRP, high-sensitivity C-reactive protein. Results are expressed as multivariable-adjusted odds ratio and 95% confidence interval (CI). Analysis performed on 1920 participants.
